# Supplementary material for: Chromatin protein complexes involved in gene repression in lamina-associated domains
Source: PubMed Central journal article supplement (PMC11535540; doi:10.1038/s44318-024-00214-1), 2024-09-25
Supplement: 44318_2024_214_MOESM1_ESM.pdf [file 44318_2024_214_MOESM1_ESM.pdf]

# Chromatin protein complexes involved in gene repression in lamina-associated domains

Stefano G Manzo, Abdelghani Mazouzi, Christ Leemans, Tom van Schaik,  
Nadia Neyazi, Marjon S van Ruiten, Benjamin D Rowland, Thijn Brummelkamp,  
Bas van Steensel

## APPENDIX

### TABLE OF CONTENTS

|                           |   |
|---------------------------|---|
| - Appendix Figure S1..... | 2 |
| - Appendix Figure S2..... | 3 |
| - Appendix Figure S3..... | 4 |
| - Appendix Table S1.....  | 5 |

A

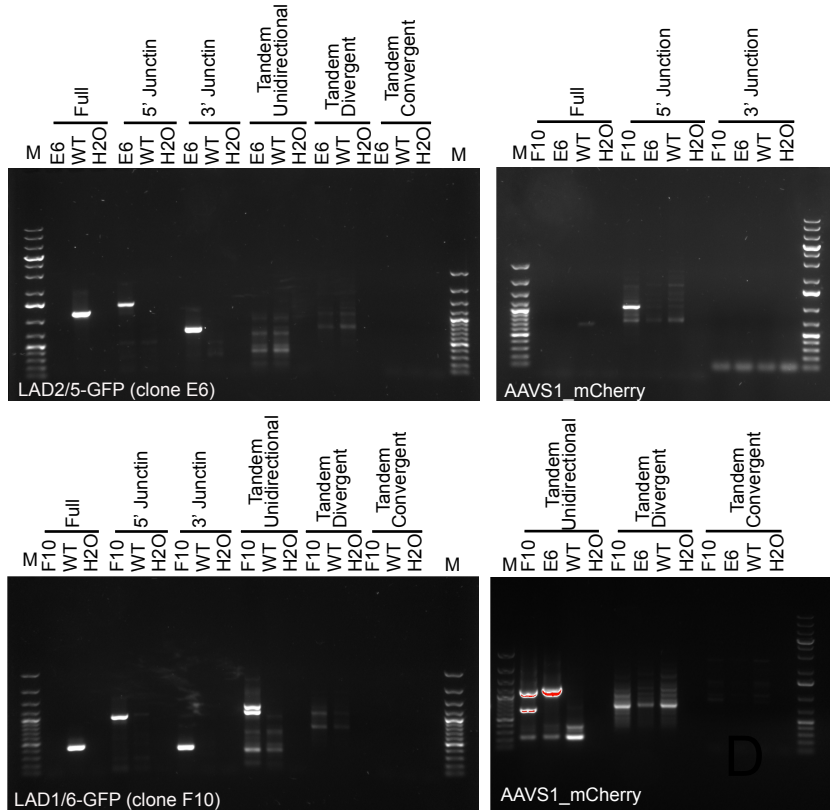

D

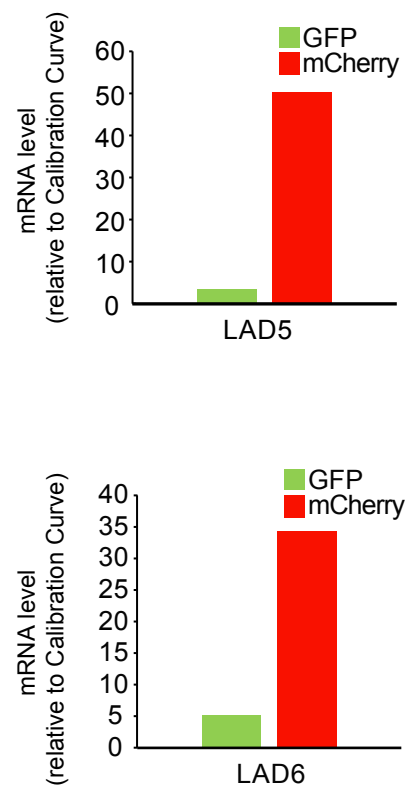

B

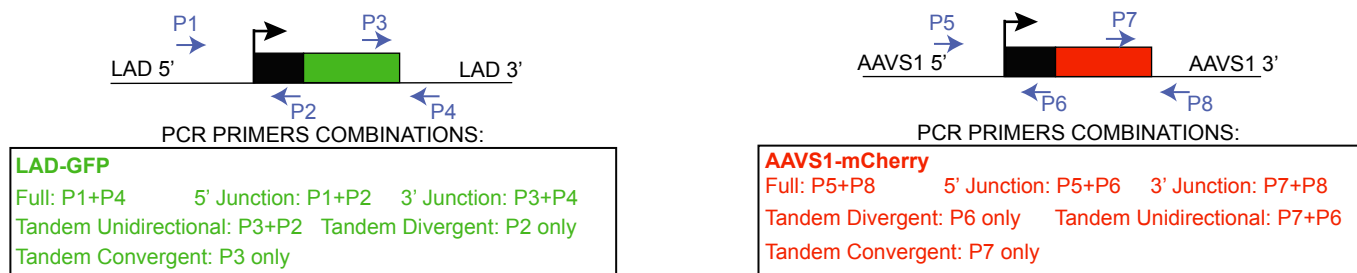

C

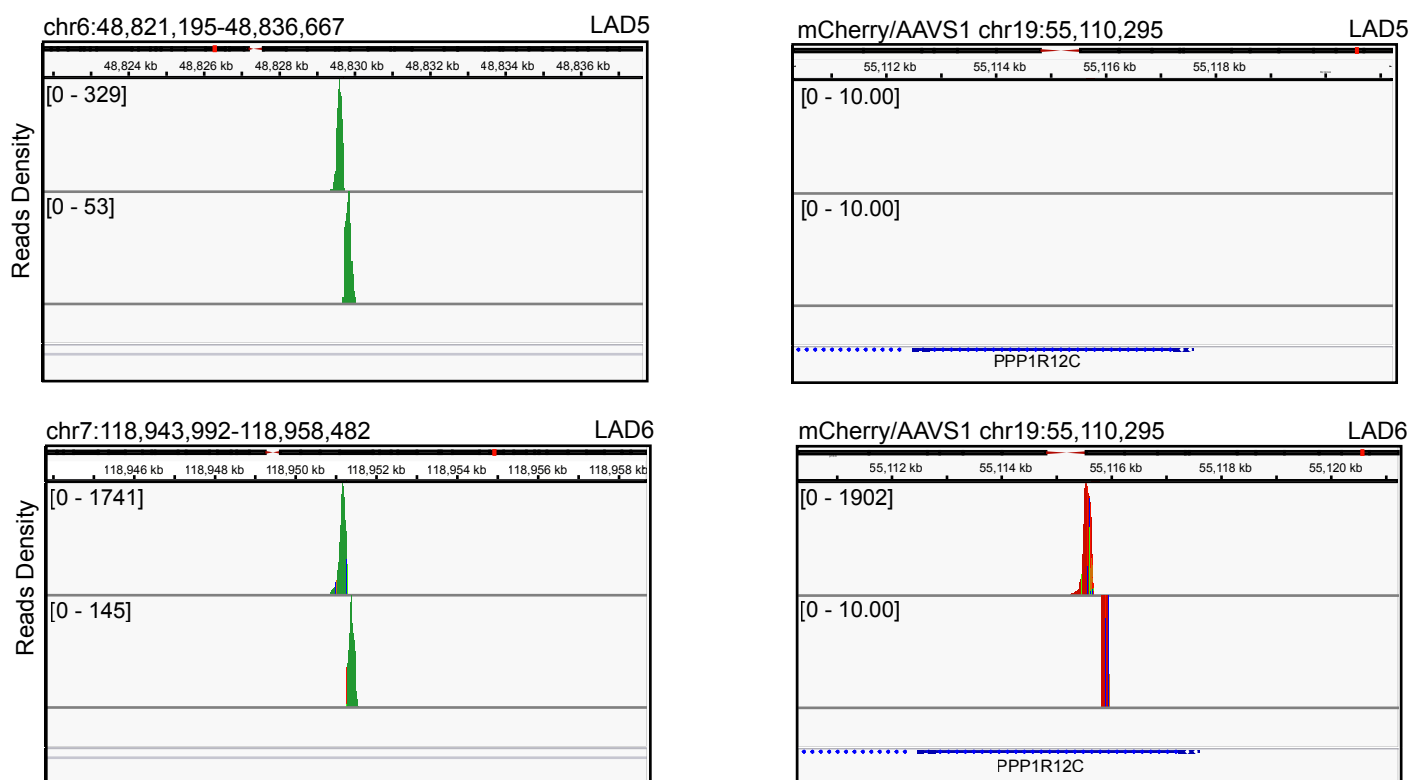

**Appendix Figure S1** A) Genotyping PCR for GFP and mCherry reporters in the selected genomic locations. Genomic DNA from wild-type HAP1 cells was used as negative control. B) Schematic of all primer combinations used in the genotyping PCR. C) Tag-Map reads around integration sites for LAD-GFP reporters and AAVS1-mCherry. D) mRNA level for GFP and mCherry for the two LAD-reporter cell lines. mRNA levels were calculated by interpolating qPCR CT values on a calibration curve generated with GFP and mCherry plasmids to intrinsically normalize for primer efficiency.

A

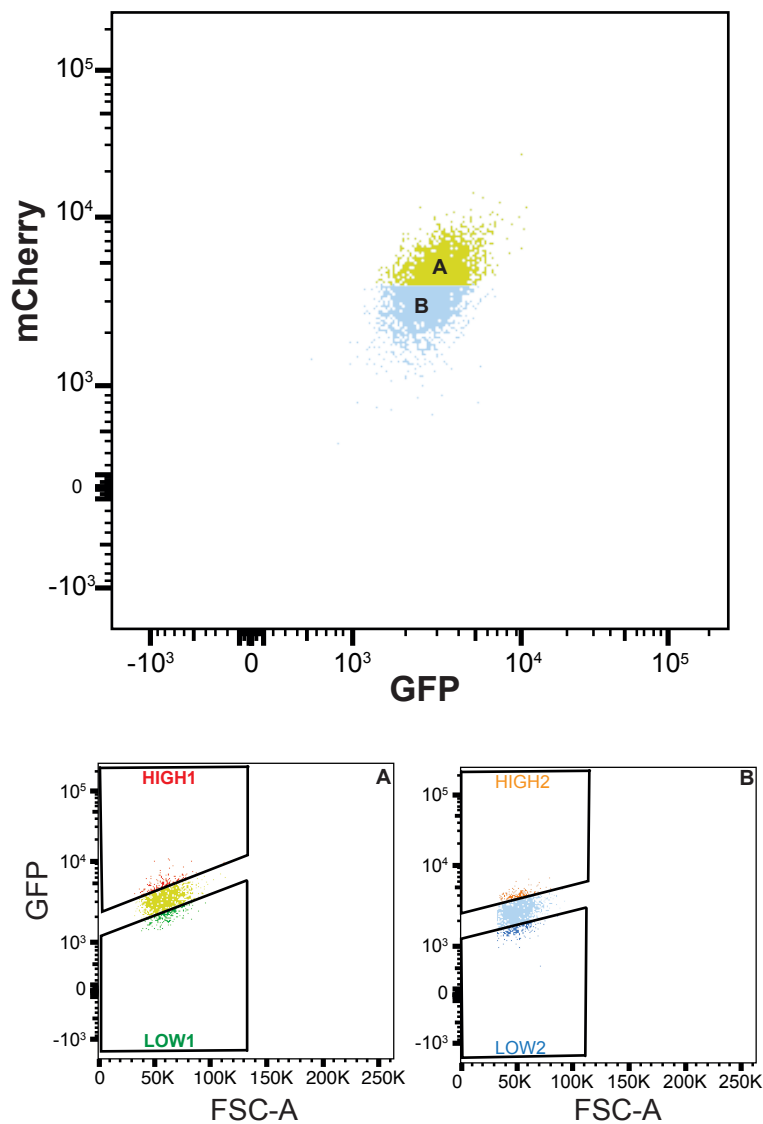

B

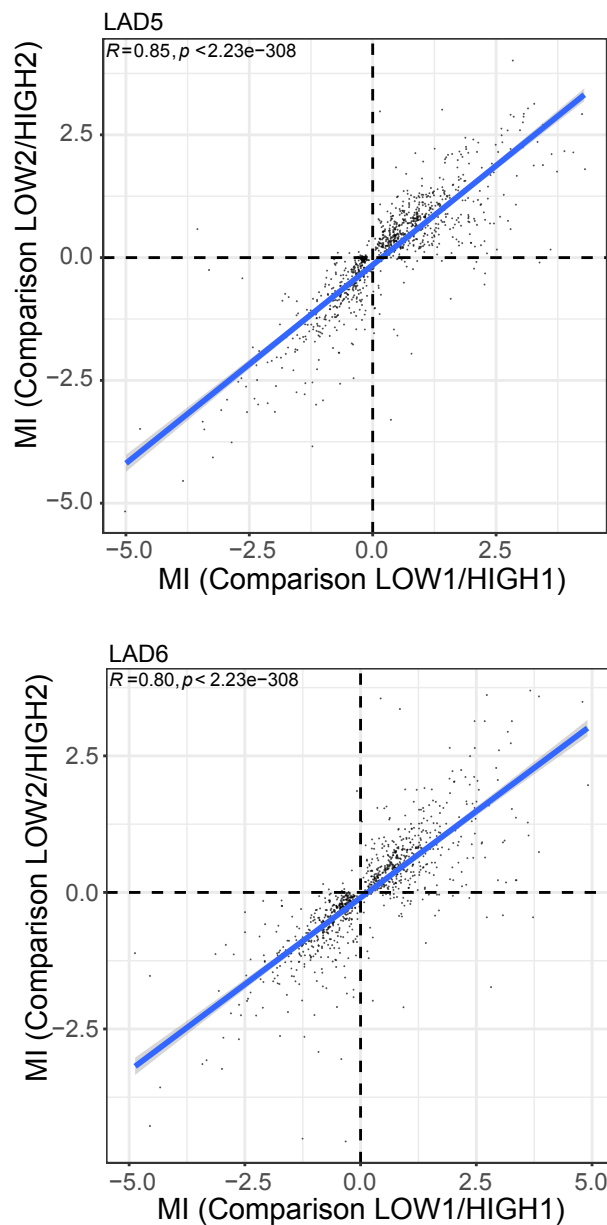

C

## LAD5 G:Profiler analysis

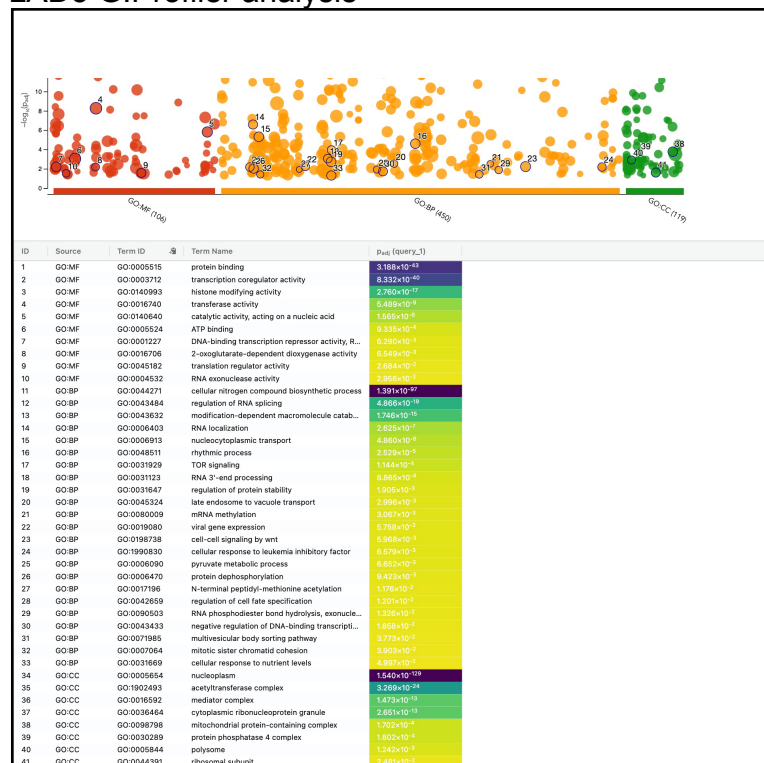

## LAD6 G:Profiler analysis

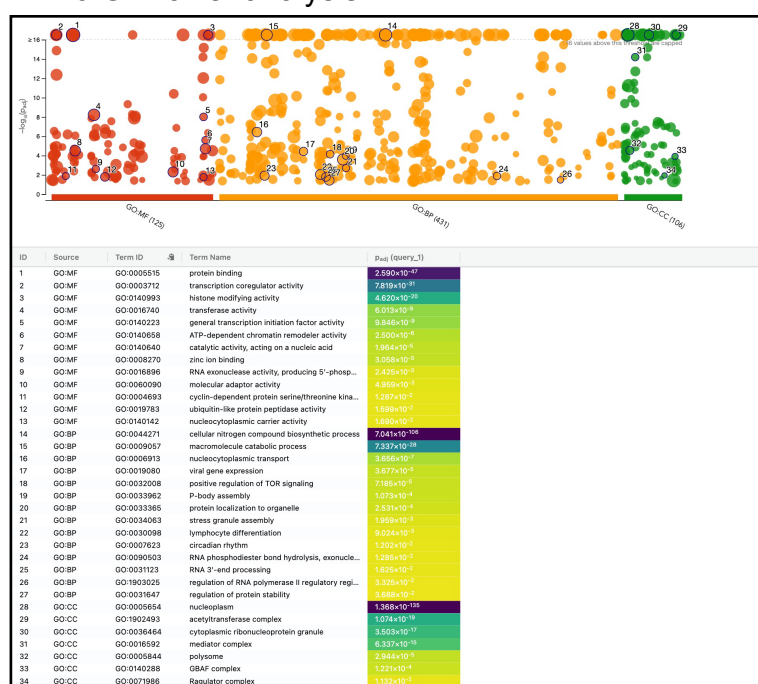

**Appendix Figure S2.** A) Sorting strategy for the screen. Gene-trapped cells were divided in two bins according to mCherry fluorescent intensity (subgroup A and B, top panel). Each subgroup was further sorted according to GFP intensity (HIGH vs LOW, bottom panels). FSC-A is forward scattering area used for gating. B) Correlation plot between mutation indexes for significant hits ( $fcpv < 0.05$ ) for LOW1/HIGH1 comparison vs LOW2/HIGH2 comparison (see also figure 1C) for GFP reporters. The blue line represents a linear model, Pearson correlation and P values are shown in the plot. B) G:Profiler analysis (Kolberg et al., 2023) for regulators of GFP reporters for LAD5 and LAD6 cell lines.

A

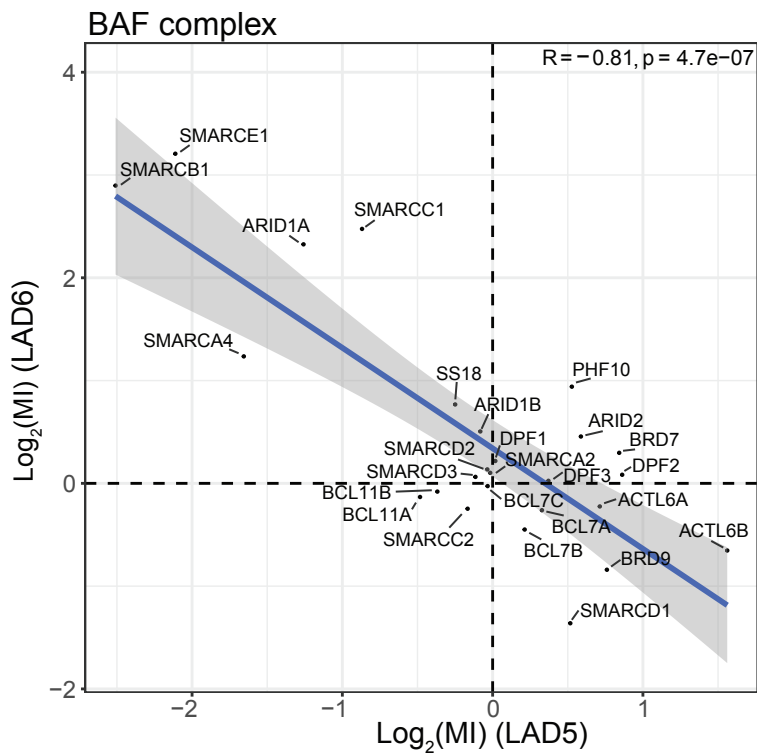

B

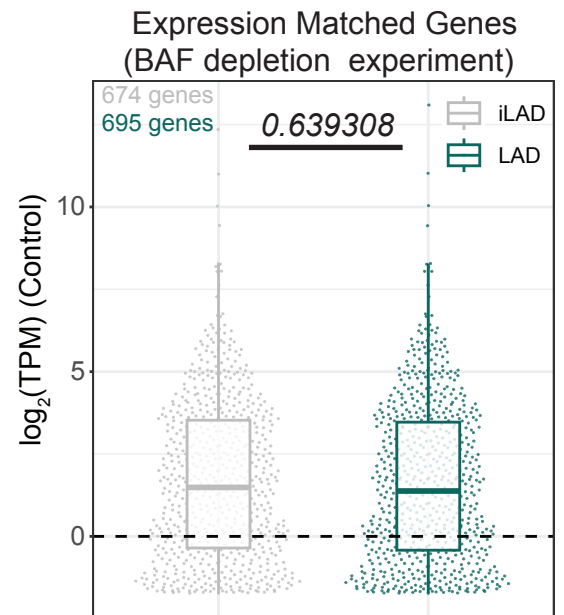

**Appendix Figure S3** A) Correlation of LAD5 and LAD6 MIs from the screen for all subunits composing the BAF complex (cBAF and pBAF). The blue line represents a fitted linear model; Pearson correlation and P values are shown in the plots B) Gene expression levels for expression-matched LAD and iLAD genes in the BAF depletion experiments. Data are from Schick et al. 2019, and are the results from three biological replicates.



**A***Jaeger et al Nat gen 2020*

| <i>degron</i> | MED1 | MED6 | MED10 | MED12 | MED14 | MED26 | MED28 | MED31 |
|---------------|------|------|-------|-------|-------|-------|-------|-------|
| up            | 0    | 78   | 12    | 0     | 67    | 0     | 0     | 0     |
| down          | 3232 | 0    | 70    | 1     | 3046  | 0     | 6     | 0     |

**Appendix Table S1.** A) Number of differentially expressed genes following acute depletion of 8 different Mediator subunits (Jaeger et al., 2020)
